RESEARCH ARTICLE

# MCP-1, KC-like and IL-8 as critical mediators of pathogenesis caused by *Babesia canis*

Asier Galán<sup>1\*</sup>, Iva Mayer<sup>2</sup>, Renata Barić Rafaj<sup>3</sup>, Krešo Bendelja<sup>4</sup>, Velimir Sušić<sup>5</sup>, José Joaquín Cerón<sup>6</sup>, Vladimir Mrljak<sup>1,2</sup>

**1** ERA Chair project "VetMedZg", Clinic for Internal Diseases, Faculty of Veterinary Medicine, University of Zagreb, Zagreb, Croatia, **2** Clinic for Internal Diseases, Faculty of Veterinary Medicine, University of Zagreb, Zagreb, Croatia, **3** Department of Chemistry and Biochemistry, Faculty of Veterinary Medicine, University of Zagreb, Zagreb, Croatia, **4** Institute of Immunology, Zagreb, Croatia, **5** Department of Animal Husbandry, Faculty of Veterinary Medicine, University of Zagreb, Zagreb, Croatia, **6** Department of Animal Medicine and Surgery, University of Murcia, Spain

\* [agcousillas@vef.hr](mailto:agcousillas@vef.hr)

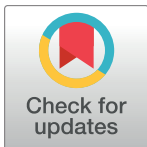

**OPEN ACCESS**

**Citation:** Galán A, Mayer I, Rafaj RB, Bendelja K, Sušić V, Cerón JJ, et al. (2018) MCP-1, KC-like and IL-8 as critical mediators of pathogenesis caused by *Babesia canis*. PLoS ONE 13(1): e0190474. <https://doi.org/10.1371/journal.pone.0190474>

**Editor:** J. Stephen Dumler, Johns Hopkins University, UNITED STATES

**Received:** August 16, 2016

**Accepted:** December 15, 2017

**Published:** January 5, 2018

**Copyright:** © 2018 Galán et al. This is an open access article distributed under the terms of the [Creative Commons Attribution License](https://creativecommons.org/licenses/by/4.0/), which permits unrestricted use, distribution, and reproduction in any medium, provided the original author and source are credited.

**Data Availability Statement:** All relevant data are within the paper and its Supporting Information files.

**Funding:** This work was supported by CORDIS, 621394 ([http://cordis.europa.eu/project/rcn/189878\\_en.html](http://cordis.europa.eu/project/rcn/189878_en.html)) and HRZZ, 4135 (<http://www.hrzz.hr/default.aspx?id=78&pid=4135&rok=2013-11>). The funders had no role in study design, data collection and analysis, decision to publish, or preparation of the manuscript.

**Competing interests:** The authors have declared that no competing interests exist. CORDIS,

## Abstract

Canine babesiosis caused by the intraerythrocytic protozoan parasite *Babesia canis* is a tick-borne disease characterized by a host response that involves both cellular and humoral immunity. This study focuses on the secretion of cytokines Granulocyte-Macrophage Colony-Stimulating Factor (GM-CSF), Keratinocyte Chemotactic-like (KC-like), Interleukins (IL)-2, IL-7, IL-8, IL-10, IL-15, IL-18 and Monocyte Chemotactic Protein-1 (MCP-1) in babesiosis caused by *Babesia canis* upon treatment with Imizol®. We assessed time dependent changes in cytokine levels and tested whether these changes correlate with pathogenesis of the disease. Sixteen healthy dogs and 31 dogs infected with *Babesia canis*, of which 18 showed complications, were treated with Imizol®. One dog died during the study (3.2%). Longitudinal study was performed by monitoring dogs at the first day of presentation (day 1) and 6 days later (day 7). Our results show that higher MCP-1 levels on day 1 are positively associated with the occurrence of complications, (complicated vs. uncomplicated;  $p = 0.00016$ ). A similar pattern was observed for KC-like on day 1 ( $p = 0.0326$ ) and day 7 ( $p = 0.044$ ). Moreover, babesiosis caused by *B. canis* produced a steady increase in IL-8 levels with a moderate to strong negative correlation with erythrocyte counts and hematocrit in uncomplicated diseased dogs only (Spearman's rank correlation coefficient  $r_s = -0.582$  and  $r_s = -0.598$  respectively). Like for MCP-1, KC-like levels also differed in complicated and uncomplicated diseased dogs on day 1 ( $p = 0.03236$ ) and day 7 ( $p = 0.044$ ). Furthermore, KC-like levels were strongly correlated with IL-8 levels ( $r_s = 0.663-0.7$ ) and non-segmented neutrophil counts ( $r_s = 0.572-0.732$ ) in both diseased groups. Analysis of ROC suggests the use of serum levels of MCP-1 and IL-7 as predictors of the occurrence of complications with an AUC of 0.906 and 0.896 respectively and linear combinations of MCP-1, KC-Like, IL-7 and GM-CSF with values up to AUC = 0.983. Cytokine cluster analysis presented in this study can contribute to a better understanding of the pathogenesis of babesiosis and serve as a prognostic tool for the early detection of cases with highest likelihood of developing complications. Overall, our studies show that infection by *B. canis* elicits a cytokine pattern that is distinct from that observed with *B. rossi*, and that some of the inflammatory mediators

Community Research and Development Information Service is the European Commission's primary portal for results of EU-funded research projects. As our funder, doesn't restrict sharing of data and/or materials. On behalf of all authors I declare that there are no competing interests that interferes with, or could reasonably be perceived as interfering with, the full and objective presentation, peer review, editorial decision-making, or publication of this research.

**Abbreviations:** APTT, Activated partial thromboplastin time; BrEMA1, *Babesia rossi* erythrocyte membrane antigen; CXC chemokines, Cysteine-X-Cysteine motif-containing chemokine; GM-CSF, Granulocyte-macrophage colony stimulating factor; KC-like, Keratinocyte-derived chemokine; IL, Interleukin; IMHA, Immune-mediated hemolytic anemia; MCP-1, Monocyte chemoattractant protein 1; MODS, Multiple organ dysfunction syndrome; PCR, Polymerase chain reaction; ROC, Receiver operating characteristic; SIRS, Systemic inflammatory response syndrome; TGF- $\beta$ , Transforming growth factor beta; PON-1, Paraoxonase-1.

can be useful to predict complications. Our results also suggest targets for the development of novel therapeutic strategies in babesiosis caused by *B. canis*.

## Introduction

Acute babesiosis is a malaria-like infection, characterized by fever, hemolytic anemia and hemoglobinuria. In dogs, it is usually caused by *Babesia canis*, present in North America, Southern Europe, parts of Asia and Africa [1] whose vectors are ticks such as *Dermacentor reticulatus* while other species are transmitted by *Haemaphysalis leachi* (*B. rossi*) and *Rhipicephalus sanguineus* (*B. vogeli*) [2]. Babesiosis caused by *B. canis* usually is characterized by low parasitemia, which does not necessarily correlate with the severity of illness [3]. Hemoglobinuria has been described in naturally infected dogs [4, 5] whereas experimental infection with *B. canis* resulted in transient low parasitemia (1–2%), thrombocytopenia, an increase in the activated partial thromboplastin time (APTT) and hypotension [6].

In contrast, *B. rossi*, the main causative organism of canine babesiosis in sub-Saharan Africa, generally elicits a virulent illness with high parasitemia [7], hypoglycemia [8] and cerebral, lung and renal involvement [9] associated with mortality. Interestingly, a polymorphic phosphoprotein, *B. rossi* erythrocyte membrane antigen 1 (BrEMA1), expressed on the cytoplasmic membrane of *B. rossi*-infected erythrocytes, has been recently described. This protein is suspected to be a major virulence factor in *B. rossi*-induced canine babesiosis [10]. *B. canis* and *B. vogeli* do not express the BrEMA1 gene.

Other babesial species cause a broad spectrum of clinical signs: *B. vogeli* usually causes a subclinical to moderate clinical disease with possible severe to fatal hemolytic anemia in young dogs and pups [11]. Immune-mediated hemolytic anemia (IMHA) [12] is common in *B. vogeli* infection but inflammatory patterns are not so uniform as in *B. canis* infections [13]. A currently unnamed large form of *Babesia* was described for the first time in a dog under chemotherapy for lymphoma [14]. *B. gibsoni* causes frequently achronic disease often associated with weight loss and fatigue [15]. *B. conradae* is usually more virulent than *B. gibsoni* resulting in higher parasitemia, more severe anemia and higher rate of mortality [16]. *B. microti-like* piroplasm (*Theileria annae*) is a recently described small piroplasm causing azotemia [17].

Canine babesiosis is defined as a protozoal sepsis [18] occurring along with a generalized uncontrolled inflammatory response of the host [19] which represents a central factor in the development of complications. Infection initiates a mechanism of antibody-mediated cytotoxic destruction of erythrocytes. Autoantibodies are directed against components of the membranes of infected and uninfected erythrocytes causing intra- and extravascular hemolysis, which can evolve to anaemia. C-reactive protein (CRP) and serum amyloid A (SAA) significantly increase in canine babesiosis but their levels are not related with the occurrence of complications neither with outcome [18, 20]. Proinflammatory cytokines and chemokines, such as TNF- $\alpha$ , IFN- $\gamma$ , IL-1 $\beta$ , IL-2, IL-6, IL-8, IL-12, IL-18 and MCP-1 are necessary to initiate an effective inflammatory response [21] and promote the transendothelial migration of leukocytes. TNF- $\alpha$  and IL-1 $\beta$  are considered the proximal or initiator cytokines of the proinflammatory response as they trigger the production of other cytokines such as IL-6 and IL-8 (distal cytokines). On the other hand, IL-4, IL-10 and transforming growth factor-beta (TGF- $\beta$ ), are required to down-regulate the cell-mediated inflammatory response by inhibiting the synthesis of pro-inflammatory cytokines [22]. In fact, the acute phase response (APR) which results in systemic inflammatory response syndrome (SIRS), one of the complications of babesiosis, is a

common feature of other types of sepsis [23]. Tissue hypoxia, trigger of many of the clinical signs and studied comprehensively in *B. rossi* infection, is considered to be more important than hemoglobinuria, and its consequent nephrotoxic effect, as a cause of kidney damage in dogs with babesiosis [24]. In a similar way as in malaria, the inefficient use of oxygen by mitochondria triggered by the effects of inflammatory cytokines is the main cause of hypoxia-related tissue damage [25]. Release of reactive oxygen species and harmful cytokine effects have been linked to endothelial damage and augmented vascular permeability in canine babesiosis [26, 27, 28].

Uncomplicated babesiosis might be a consequence of hemolysis without excessive inflammatory response while in complicated canine babesiosis and in malaria caused by *Plasmodium falciparum* pathology is believed to be the result of excessive production of pro-inflammatory cytokines [29] generating SIRS and multiple organ dysfunction syndrome (MODS) [30] with a 15% mortality rate.

In case of the most severe complications of *P. falciparum* malaria, cerebral malaria (CM) and severe malarial anemia (SA), both likely occur along with a dysregulation of the immune system [31]. Cytokines in malaria are key factors in regulating the progression of disease and are closely related to symptoms, parasitemia, severity of pathology and outcome [32]. High concentrations of pro-inflammatory cytokines such as TNF- $\alpha$ , IFN- $\gamma$ , IL-6, IL-8, IL-18 and MCP-1 have been associated with severe malaria and death [33]. Regulatory cytokines such as IL-10 and TGF- $\beta$  are important to limit that pro-inflammatory response [34].

Despite the comprehensive research on the inflammatory response caused by babesiosis, it is not completely understood how imbalances in cytokine levels develop and determine the course of the disease, occurrence of complications and outcome. In this study we use a multiplex approach to monitor simultaneously the concentrations of diverse cytokines and detect expected imbalances, to determine which cytokines discriminate more significantly uncomplicated and complicated babesiosis and to establish levels of cytokines as prognostic markers.

## Materials and methods

### Animals

47 dogs were retrospectively included in this study and divided into 2 main groups. **Group 1** consisted of 31 dogs naturally infected by *B. canis*, admitted at the Clinic for Internal Diseases, Faculty of Veterinary Medicine, University of Zagreb, Croatia, with clinical signs of acute babesiosis. The clinical manifestations included anorexia, lethargy and fever, pale mucous membranes, anemia, jaundice, hemoglobinuria or hematuria, splenomegaly, tachycardia and vomiting. Dogs were of various breeds, between 1 and 14 years of age, 18 males and 13 females. Protocol was approved by the Ethics Committee for Animal Experimentation, Faculty of Veterinary Medicine, University of Zagreb, Croatia (Permit No: 251-61-01/139-12-2). Permission to collect blood samples was obtained from each dog owner. Owners were informed about the use of the specimens and the aims of the research.

Diagnosis was confirmed by demonstration of the parasites within the infected erythrocytes in Romanowsky-stained thin blood smears. One dose (6 mg/kg of body weight) of imidocarb dipropionate (Imizol<sup>®</sup>, Schering-Plough) was administered to all the dogs subcutaneously on the day of admission (day 1). Additional treatment consisted of various fluids (colloid and crystalloid therapy), and whole blood transfusion when it was indicated. Subspecies were confirmed using PCR (polymerase chain reaction) [6]. On the basis of clinical manifestations and laboratory data the infected dogs were classified into two subgroups: complicated (18 dogs, 8 Female, 10 Male) and uncomplicated (13 dogs, 5 Female, 8 Male). The classification of clinical manifestations of the complicated form of babesiosis is based on the World Health

Organization (WHO) classification for malaria [35]. The main complications are the development of an excessive inflammatory response named "systemic inflammatory response syndrome" or SIRS [36] and a multiple organ dysfunction syndrome or MODS [37].

According to the criteria for the diagnosis of SIRS used in this study [9], [38] dogs were classified as SIRS positive if two or more of the following 4 criteria were fulfilled: body temperature higher than 39.5°C or lower than 38°C, heart rate more than 160 beats/min, respiration rate more than 20 breaths/min and WBC count less than  $6 \times 10^9/L$  or more than  $12 \times 10^9/L$  or with more than 10 percent band neutrophils. Dogs with obvious concurrent inflammatory processes as trauma, wounds or infections, known cardiopathies or neoplastic diseases were excluded from the study. Dogs treated with any anti-inflammatory medication within 3 weeks prior to diagnosis were also excluded. All dogs showing complications were treated according to standard procedures (infusion, anti-inflammatories and blood transfusion only in case hematocrit was under 20%). Blood samples for cytokine quantification were obtained 6–8 hours after the treatment was administered.

An animal was classified as MODS positive if two or more of the following criteria were fulfilled: renal dysfunction (serum creatinine concentration higher than 180  $\mu\text{mol/l}$ ), hepatic dysfunction (both alanine aminotransferase (ALT) greater than 176 IU/l and alkaline phosphatase (AP) greater than 360 IU/l), respiratory system dysfunction (radiographic evidence of pulmonary oedema or dyspnoea), and muscular involvement (creatine phosphokinase (CPK) more than 600 IU/l) [9]. Cases with high serum creatinine concentration due to pre-renal causes (e.g., dehydration due to vomiting) were excluded after examining oral mucosa, skin turgor and ocular appearance as well as checking concentrations of serum urea, serum albumin and total protein and determining urine specific gravity. 66% of complicated cases were MODS positive and all of them were SIRS positive.

**Group 2** (healthy controls) included two subgroups: animals treated by prophylactic single application of imidocarb dipropionate (Imizol®), Schering-Plough) consisted of 8 dogs (**Group 2a**) of different breeds and sexes, aged from 1 to 10 years. These dogs were considered healthy based on physical examination and hematological and biochemical data, and they attended the hospital to receive a prophylactic dose of imidocarb dipropionate (6 mg/kg) as a preventive measure against babesiosis upon owners' request. Another subgroup (**Group 2b**) consisted of 8 dogs, different breeds and genders, aged from 1 to 14 years. These dogs attended routine check controls and were considered healthy based on clinical examination and hematological and biochemical data. Due to the fact that no significant differences in clinical hematology, serum biochemistry and cytokine profile results were identified between the two subgroups, these subgroups were merged into a single healthy control group.

All serum samples from dogs were screened for simultaneous qualitative detection of circulating antibodies, both immunoglobulin G (IgG) and IgM, to *B. canis*, *Borrelia burgdorferi*, *Anaplasma phagocytophilum* and *Dirofilaria immitis* antigen using an in-clinic enzyme-linked immunosorbent assay (ELISA) SNAP 4Dx (IDEXX Laboratories, Hoofddorp, The Netherlands), according to the manufacturer's instructions.

## Blood samples

Blood samples from **groups 1 and 2a** were collected from the cephalic vein on the day of admission, and 6 days after the administration of imidocarb dipropionate (Imizol®). Blood samples for analysis from **group 2b** were obtained during routine visits to a Clinic. Blood was collected using a 20 gauge needle in tubes with EDTA for hematological analysis and serum vacutainer tubes. A complete list of all samples with cytokine concentration values and hematologic parameters as well as reference ranges is included in [S1 Table](#).

## Hematological analysis

Blood smears were prepared and PCR reactions performed using blood obtained on EDTA. White blood cell count (WBC), platelet count, hematocrit (HCT) and other hematologic parameters were determined using a Horiba ABX automatic hematology analyser (Diagnostics, Montpellier, France). Segmented and non-segmented neutrophils were manually counted in blood smear by experienced personnel.

## Quantification of cytokines in serum

Blood collected in serum tubes was allowed to clot and tubes were centrifuged at 1200 xg, 10 minutes at room temperature. A portion of the serum was used for routine biochemical analysis while the remainder was stored at -80°C until it was used to analyse cytokines. Cytokine profiles were determined using the MILLIPLEX MAP Canine Cytokine/ Chemokine Magnetic Bead Panel (CCYTO-90K Millipore, Billerica, MA) with an automated analyser (Luminex 200, Luminex Corporation, Austin, TX). The concentrations of interleukin-2 (IL-2), IL-7, IL-8, IL-10, IL-15, IL-18, MCP-1, granulocyte-macrophage colony stimulating factor (GM-CSF) and keratinocyte chemoattractant KC-like were analyzed. Prior to analysis, samples were thawed, vortexed, and centrifuged at 1000x g for 10 min to separate particulates. The analytes were measured in duplicate, according to the manufacturer’s instructions. Briefly, the plate was pre-wet with wash buffer and standards, controls and samples were added to the appropriate wells. After washing, the detection antibodies were added to each well. After incubation, the plate was run on Luminex. The median fluorescent intensity (MFI) was analyzed and the concentrations of analytes were derived using standard curves.

## Statistical analysis

Statistical analysis was performed using STATISTICA version 10 (StatSoft. Inc., 2011). Given that most variables were not normally distributed, statistical differences were assessed using the non-parametric Mann-Whitney *U* test. *p*-values of <0.05 were considered to be significant. Correlations were assessed by both Spearman’s rank correlation test and Pearson’s product-moment correlation test.

## Results

We have analysed cytokine concentrations of 31 dogs suffering from babesiosis versus 16 healthy animals (Table 1). We observed higher levels of cytokines on day 1. This trend reached a plateau or reverted (remarkably for IL-10) on day 7 for most cytokines with the exception of IL-8 for which an increase was noted.

All cytokine levels shown registered a significant increase upon babesiosis (Table 2) on day 1 and all except IL-7, IL-10 and MCP-1 keep significantly higher levels than healthy controls on day 7. When comparing uncomplicated and complicated diseased dogs, all cytokines except

**Table 1.**

| Group                                  | Gender                | Age (years) Average±Standard deviation |
|----------------------------------------|-----------------------|----------------------------------------|
| <b>Group 1</b>                         |                       |                                        |
| <b>Diseased uncomplicated (n = 13)</b> | 8M (61.5%) 5F (38.5%) | 4.31±2.81                              |
| <b>Diseased complicated (n = 18)</b>   | 10M (56%) 8F (44%)    | 5.83±3.56                              |
| <b>Group 2 (a+b)</b>                   |                       |                                        |
| <b>Healthy (n = 16)</b>                | 9M (56%) 7F (44%)     | 5.07±3.78                              |

<https://doi.org/10.1371/journal.pone.0190474.t001>

**Table 2. Cytokine levels in different groups and subgroups.** Cytokine concentrations (in pg/ml serum) for healthy dogs (n = 16), *B. canis*-infected dogs on the day 1 (n = 31) and 7 (n = 30) and subset of uncomplicated (n = 13) and complicated groups (n = 18). 1 dog with complications died during the study. p-values for significant differences are shown for each comparison.

|                                     | CONCENTRATION (pg / ml serum) |          |          |         |           |          |         |         |          |
|-------------------------------------|-------------------------------|----------|----------|---------|-----------|----------|---------|---------|----------|
|                                     | GM-CSF                        | KC-like  | IL-2     | IL-7    | IL-8      | IL-10    | IL-15   | IL-18   | MCP-1    |
| <b>Healthy (n = 16)</b>             |                               |          |          |         |           |          |         |         |          |
| Min-Max                             | 60–154                        | 28–269   | 10–75    | 39–109  | 122–235   | 1–1      | 42–142  | 2–840   | 159–792  |
| Median                              | 87                            | 39       | 17       | 55      | 137       | 1        | 77      | 83      | 193      |
| SD                                  | 24                            | 58       | 26       | 20      | 42        | 0        | 26      | 232     | 154      |
| <b>Diseased day 1 (n = 31)</b>      |                               |          |          |         |           |          |         |         |          |
| Min-Max                             | 130–782                       | 104–2739 | 22–2514  | 31–1957 | 10–6502   | 1–2106   | 12–5436 | 2–2278  | 163–1921 |
| Median                              | 182                           | 532      | 96       | 101     | 856       | 560      | 160     | 188     | 390      |
| SD                                  | 176                           | 639      | 525      | 378     | 1541      | 421      | 1032    | 487     | 494      |
| p-value                             | < 0.0001                      | < 0.0001 | < 0.0001 | 0.019   | < 0.0001  | < 0.0001 | 0.007   | 0,044   | 0,001    |
| <b>Diseased day 7 (n = 30)</b>      |                               |          |          |         |           |          |         |         |          |
| Healthy(n = 16)                     |                               |          |          |         |           |          |         |         |          |
| Min-Max                             | 135–2822                      | 110–2184 | 12–4038  | 35–3633 | 425–8818  | 1–548    | 29–5548 | 2–8748  | 156–7667 |
| Median                              | 196                           | 561      | 49       | 80      | 2754      | 1        | 219     | 207     | 237      |
| SD                                  | 544                           | 602      | 774      | 706     | 2185      | 108      | 1089    | 1900    | 1434     |
| p-value                             | < 0.0001                      | < 0.0001 | 0.014    | 0.1308  | < 0.0001  | 0.321    | 0.007   | 0.029   | 0.09     |
| <b>Uncomplicated day 1 (n = 13)</b> |                               |          |          |         |           |          |         |         |          |
| Min-Max                             | 130–220                       | 104–969  | 22–187   | 31–119  | 35–5019   | 1–2106   | 12–342  | 2–490   | 163–436  |
| Median                              | 143                           | 330      | 89       | 51      | 601       | 461      | 111     | 145     | 224      |
| SD                                  | 29                            | 282      | 44       | 26      | 1477      | 527      | 110     | 180     | 95       |
| <b>Complicated day 1 (n = 18)</b>   |                               |          |          |         |           |          |         |         |          |
| Min-Max                             | 131–782                       | 162–2739 | 22–2514  | 35–1957 | 10–6502   | 180–1499 | 12–5436 | 2–2278  | 181–1921 |
| Median                              | 254                           | 567      | 131      | 139     | 908       | 592      | 265     | 188     | 576      |
| SD                                  | 198                           | 749      | 665      | 470     | 1620      | 342      | 1324    | 610     | 552      |
| p-value                             | 0.00066                       | 0.0322   | 0.025    | 0.00019 | 0.509     | 0.675    | 0.065   | 0.34683 | 0.00015  |
| <b>Uncomplicated day 7 (n = 13)</b> |                               |          |          |         |           |          |         |         |          |
| Min-Max                             | 139–272                       | 117–2009 | 12–276   | 39–183  | 1391–6294 | 1–1      | 29–1109 | 2–762   | 156–282  |
| Median                              | 154                           | 440      | 28       | 68      | 2852      | 1        | 184     | 145     | 191      |
| SD                                  | 44                            | 474      | 87       | 48      | 1362      | 0        | 309     | 231     | 42       |
| <b>Complicated day 7 (n = 17)</b>   |                               |          |          |         |           |          |         |         |          |
| Min-Max                             | 135–2822                      | 110–2184 | 12–4038  | 35–3633 | 425–8818  | 1–548    | 29–5548 | 2–8748  | 156–7667 |
| Median                              | 254                           | 830      | 65       | 84      | 1911      | 1        | 253     | 225     | 365      |
| SD                                  | 689                           | 635      | 1005     | 917     | 2695      | 141      | 1406    | 2484    | 1844     |
| p-value                             | 0.059                         | 0.04455  | 0.391    | 0.503   | 0.503     | 0.601    | 0.769   | 0.834   | 0.013    |

<https://doi.org/10.1371/journal.pone.0190474.t002>

IL-8, IL-10, IL-15 and IL-18 are significantly different on the day 1 but only KC-like and MCP-1 show significantly different levels on day 7. The most significant longitudinal variation within uncomplicated cases was for IL-10, IL-8 and GM-CSF while only IL-10 and IL-8 varied significantly over time in complicated cases.

MCP-1 concentrations were significantly elevated for the *B. canis*-infected dogs when comparing healthy dogs and complicated diseased dogs on the day 1 (p<0.00001) and 7 (p = 0.01174). Uncomplicated and complicated cases on both day 1 and 7 (p = 0.00016 and p = 0.01352 respectively) show significant differences in MCP-1 levels (Fig 1).

We observed a very significant increase in IL-8 concentration (Fig 2) comparing healthy dogs with uncomplicated and complicated cases (p< 0.00001 and p< 0.0005 respectively) with

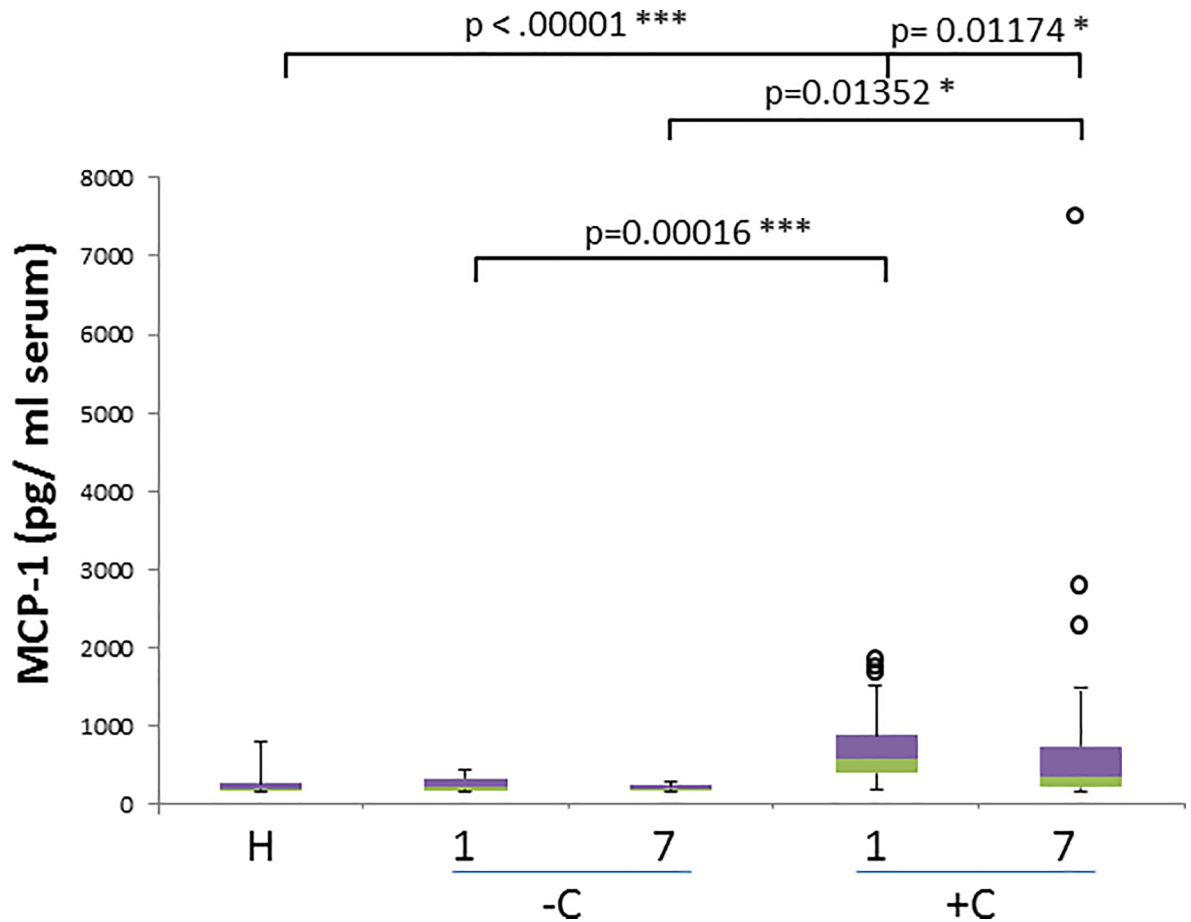

**Fig 1. MCP-1 concentration in healthy and naturally infected dogs and its relation with outcome.** Box and whisker plot with outliers showing interquartile range (median bar in intersect between two colors in box) of MCP-1 concentration values among different groups: healthy dogs (H), uncomplicated (-C) and complicated (+C) cases for both day 1 and day 7. Mann-whitney test p-values are shown for comparison of different groups.

<https://doi.org/10.1371/journal.pone.0190474.g001>

even more significant increase on day 7 (Fig 2). IL-8 levels are not useful to discriminate uncomplicated and complicated cases, but increased over time in both groups ( $p = 0.00174$  for uncomplicated;  $p = 0.0139$  for complicated).

KC-like levels show a very significant increase in all diseased animals in both day 1 and day 7 ( $p < 0.00001$ ). Additionally, KC-like levels show significant differences when comparing uncomplicated and complicated cases both on day 1 and 7 ( $p = 0.0324$  and  $p = 0.044$  respectively) (Fig 3) (Table 2). We registered a strong negative correlation of KC-Like levels with erythrocyte counts ( $r_s = -0.627$ ) for complicated cases on day 7, and a positive correlation with non-segmented neutrophil percent for both diseased groups on the same day ( $r_s = 0.732$  for uncomplicated,  $r_s = 0.736$  for complicated) as well as in complicated cases on the day 7 ( $r = 0.572$ ) (Table 3).

We registered a very significant IL-10 increase in all diseased animals ( $p < 0.00001$ ) on day 1 (Fig 4) and a decrease back to the levels registered in healthy dogs on the day 7 of treatment (slightly more significant in complicated cases with a  $p < 0.00001$  vs. a  $p = 0.00008$  for uncomplicated cases). No association with the occurrence of complications was detected (Fig 4).

Interestingly, IL-8 data obtained on the day 1 of treatment show a negative correlation with both hematocrit ( $r_s = -0.598$ ) and erythrocyte count ( $r_s = -0.582$ ) in uncomplicated cases on the

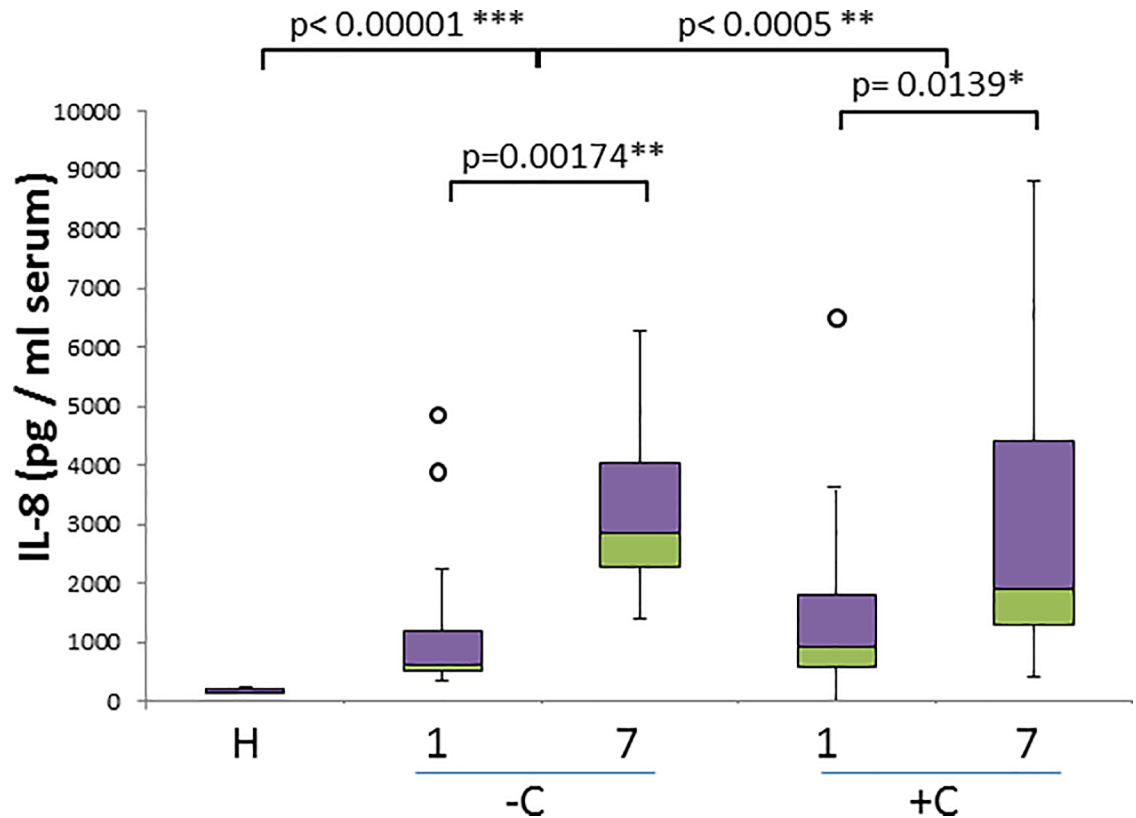

**Fig 2. IL-8 concentration in healthy and naturally infected dogs and its relation with outcome.** Box and whisker plot with outliers showing interquartile range (median bar in intersect between two colors in box) of IL-8 concentration values among different groups among different groups: healthy dogs (H), uncomplicated (-C) and complicated (+C) cases for both day 1 and day 7. Mann-whitney test p- values are shown for comparison of different groups.

<https://doi.org/10.1371/journal.pone.0190474.g002>

day 1. Additionally, IL-8 shows a very strong ( $r = 0.7$ ) correlation with KC-Like among uncomplicated cases in measurements performed on day 1, as well as in the same group on day 7 ( $r = 0.692$ ) (Table 3) confirming results obtained previously for *B. canis*-caused babesiosis [39].

HCT is significantly decreased ( $p < 0.0001$ ) in both diseased groups on day 1 but HCT normalized on day 7 in uncomplicated cases only (Fig 5).

IL-2 and IL-7, as the rest of cytokines analysed, show a significant increase on the day 1 (Table 2), with significantly higher concentrations in complicated cases. IL-7 shows significant differences comparing uncomplicated and complicated cases ( $p = 0.0002$ ) (Fig 6), whereas IL-2 shows lower significance for the differences between both groups ( $p = 0.0251$ ). None of these 2 cytokines are able to discriminate uncomplicated and complicated cases on day 7.

GM-CSF discriminates very significantly ( $p < 0.00001$ ) healthy dogs and all diseased groups (Fig 7), most notably when comparing healthy dogs with records obtained on day 7 of treatment (Table 2). There is a significant difference in GM-CSF concentrations for uncomplicated and complicated cases ( $p = 0.00068$ ) on the day 1 but no significant differences were found on day 7. Additionally, GM-CSF shows the highest  $r_s$  of all cytokines with IL-2 and IL-7 on day 7, both in uncomplicated ( $r_s = 0.969$  and  $0.848$ ) and in complicated cases ( $r_s = 0.779$  and  $0.853$ ) (Table 3).

Other cytokines (IL-15 and IL-18) show significantly elevated levels in diseased animals but no significant association with complications (Table 2).

A recent study focused on the establishment of prognostic markers of outcome for acute babesiosis caused by *B. canis* [40], though the number of samples in that study was quite low.



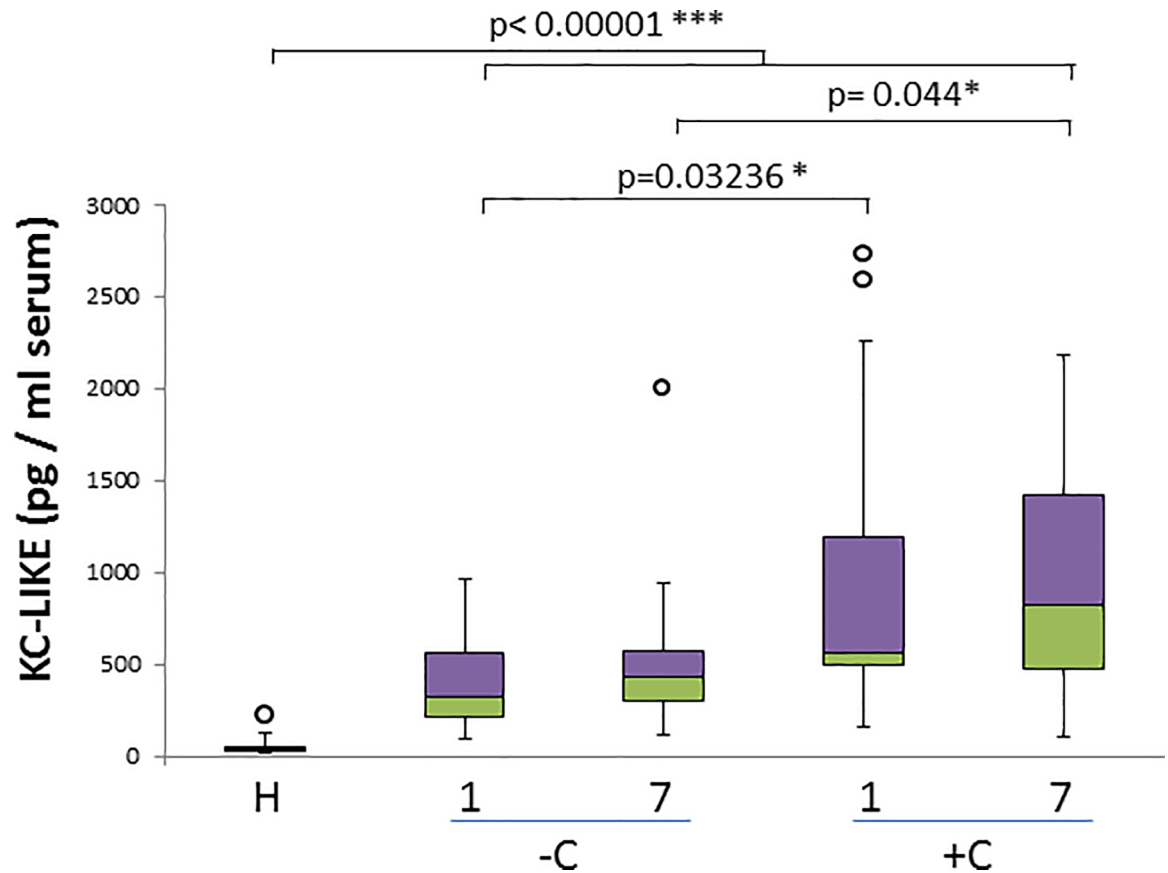

**Fig 3. KC-like concentration in healthy and naturally infected dogs and its relation with outcome.** Box and whisker plot with outliers showing interquartile range (median bar in intersect between two colors in box) of KC-like concentration values among different groups: healthy dogs (H), uncomplicated (-C) and complicated (+C) cases for both day 1 and day 7. Mann-whitney test p-values are shown for comparison of different groups.

<https://doi.org/10.1371/journal.pone.0190474.g003>

Since our results point out MCP-1 as the analyte with the most significant prognostic value, we calculated the Receiver Operating Characteristic (ROC) curve (Fig 8) to discriminate uncomplicated from complicated cases on the day 1, with an Area Under the Curve (AUC) of 0.906, indicating an excellent discrimination. ROC curves for individual values of IL-7, GM-CSF and KC-like showed the highest AUC values among the rest of the cytokines in the present study (0.896, 0.867 and 0.729 respectively). Linear combinations of cytokine concentration values yielded higher AUC values than individual cytokines in ROC curves (Fig 8) with highest values obtained corresponding to the combinations including MCP-1, KC-like, IL-7 and GM-CSF (AUC = 0.983 for LC3). Cut-off values for every parameter in ROC curves and their corresponding sensitivity and specificities along with AUC values are shown in Table 4.

Calculation of correlation coefficient was performed for all combinations of cytokines and hematological parameters and the highest values (strongest positive or negative correlations) are summarized in Table 3.

## Discussion

Despite diagnostic and therapeutic advances [41], complications from babesiosis caused by *B. canis* continue to be a cause of mortality. Pro- and anti-inflammatory cytokines act in a multifactorial manner after being released following injury, endotoxin release, complement

**Table 3. Highest Spearman's rank and Pearson's product moment correlation coefficients ( $r_s$  and  $r$ ).** Highest values for  $r_s$  and  $r$  (in brackets) for cytokine:cytokine and cytokine:hematologic parameter within different groups. E: Erythrocyte count, HCT:Hematocrit, Thr: Thrombocyte count, NN: Non-segmented neutrophil count SN: Segmented neutrophil count, L: Leukocyte count, Eos: Eosinophil count.

| Cytokine: cytokine         | GM-CSF         | IL-2           | IL-7         | IL-8         | IL-15        | IL-18        | MCP-1        |
|----------------------------|----------------|----------------|--------------|--------------|--------------|--------------|--------------|
| <b>Healthy</b>             |                |                |              |              |              |              |              |
| IL-7                       |                |                |              |              |              | 0.482(0.769) | 0.716(0.782) |
| IL-18                      |                |                |              |              |              |              | 0.498(0.895) |
| <b>-C day 1</b>            |                |                |              |              |              |              |              |
| GM-CSF                     |                |                | 0.634(0.722) |              |              |              |              |
| KC-LIKE                    |                |                |              | 0.7(0.866)   |              |              |              |
| <b>+C day 1</b>            |                |                |              |              |              |              |              |
| KC-LIKE                    |                |                |              | 0.663(0.654) |              |              |              |
| IL-2                       |                |                | 0.717(0.798) |              |              |              |              |
| <b>-C day 7</b>            |                |                |              |              |              |              |              |
| GM-CSF                     |                | 0.969(0.827)   | 0.848(0.796) |              |              |              | 0.806(0.810) |
| KC-LIKE                    |                |                |              | 0.692(0.777) |              |              |              |
| IL-2                       |                |                | 0.822(0.726) |              | 0.65(0.832)  |              | 0.837(0.793) |
| IL-7                       |                |                |              |              |              | 0.717(0.742) |              |
| <b>+C day 7</b>            |                |                |              |              |              |              |              |
| GM-CSF                     |                | 0.779(0.934)   | 0.853(0.973) |              | 0.751(0.956) | 0.771(0.958) | 0.746(0.946) |
| IL-2                       |                |                | 0.810(0.981) |              | 0.799(0.984) |              | 0.500(0.891) |
| IL-7                       |                |                |              |              | 0.893(0.993) |              | 0.597(0.917) |
| IL-15                      |                |                |              |              |              | 0.796(0.914) | 0.525(0.827) |
| <b>Cytokine:Hematology</b> | <b>E</b>       | <b>HCT</b>     | <b>Thr</b>   | <b>NN%</b>   | <b>SN%</b>   | <b>Eos</b>   | <b>Mono%</b> |
| <b>Healthy</b>             |                |                |              |              |              |              |              |
| GM-CSF                     |                |                |              |              |              | 0.563(0.758) |              |
| MCP-1                      | -0.611(-0.572) |                | 0.578(0.597) |              |              |              |              |
| <b>-C day 1</b>            |                |                |              |              |              |              |              |
| KC-LIKE                    |                |                |              | 0.732(0.812) |              |              |              |
| IL-8                       | -0.582(-0.863) | -0.598(-0.542) |              | 0.514(0.677) |              |              | 0.641(0.825) |
| <b>+C day 1</b>            |                |                |              |              |              |              |              |
| KC-LIKE                    |                |                |              | 0.736(0.834) |              |              |              |
| <b>+C day 7</b>            |                |                |              |              |              |              |              |
| GM-CSF                     |                |                |              |              |              | 0.563(0.796) |              |
| KC-LIKE                    | -0.627(-0.656) | -0.648(-0.688) |              | 0.572(0.610) |              |              |              |
| IL-7                       |                |                |              |              |              | 0.546(0.766) |              |
| IL-15                      |                |                |              |              |              | 0.513(0.746) |              |
| IL-18                      |                |                |              |              |              | 0.612(0.880) |              |

<https://doi.org/10.1371/journal.pone.0190474.t003>

activation and others. In babesiosis, when the inflammatory response becomes uncontrolled, SIRS takes place. SIRS, if not down-regulated, can lead to MODS and, if not treated to terminal condition.

Several efforts have been made in different inflammatory disorders to elucidate the origin of imbalances in cytokine clusters associated to SIRS, MODS and other major complications. TNF- $\alpha$  levels have been correlated with indices of renal damage and blood pressure in dogs infected with *B. canis* [42]. Additionally, the injection of TNF- $\alpha$  into experimental animals causes a syndrome resembling septic shock and infusion of recombinant TNF- $\alpha$  into humans results in SIRS [43]. Equilibrium between TNF- $\alpha$ , IL-1 $\beta$  and anti-inflammatory IL-10 has been proven highly dynamic and dependent on genetic heterogeneity in human sepsis and SIRS. Our

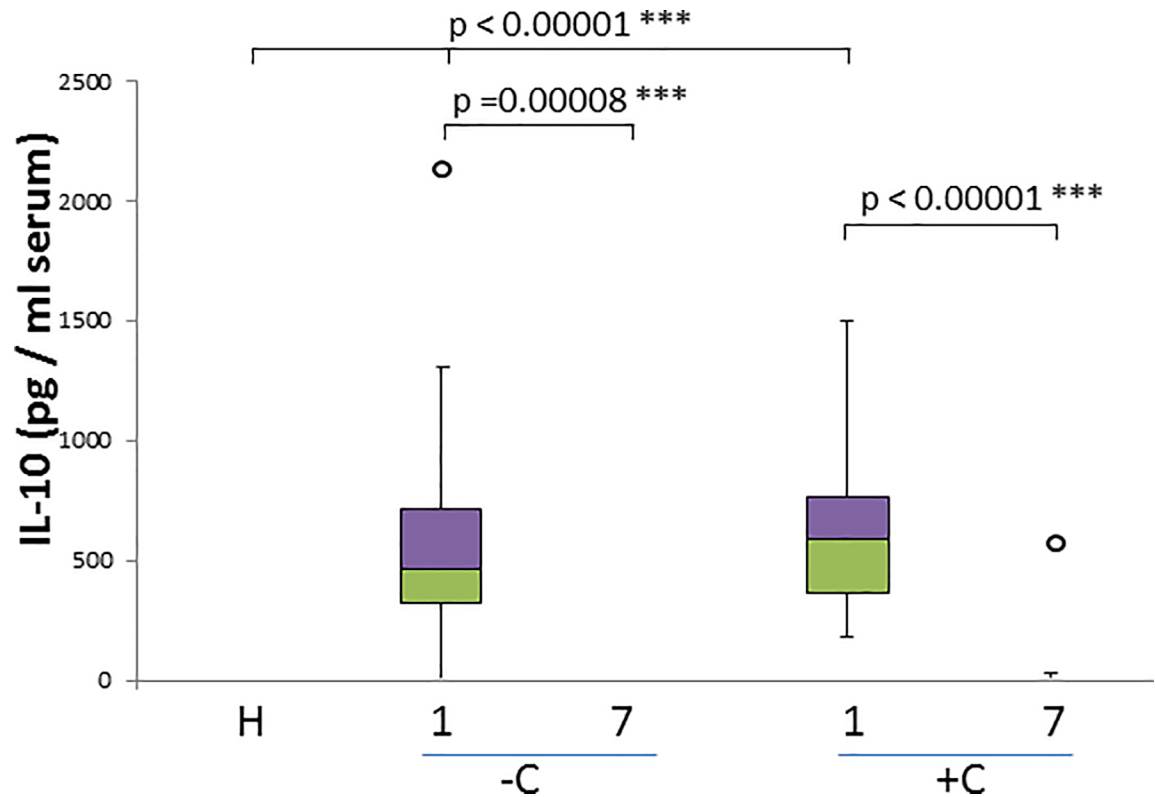

**Fig 4. IL-10 concentration in healthy and naturally infected dogs and its relation with outcome.** Box and whisker plot with outliers showing interquartile range (median bar in intersect between two colors in box) of IL-10 concentration values among different groups: healthy dogs (H), uncomplicated (-C) and complicated (+C) cases for both day 1 and day 7. Mann-whitney test p-values are shown for comparison of different groups.

<https://doi.org/10.1371/journal.pone.0190474.g004>

present data registered a global increase of cytokine concentrations in serum of *B.canis*-infected dogs though some of them show higher significance, a stronger association with complications and a different longitudinal behaviour. Among the analytes, MCP-1 and KC-like showed significantly different levels in uncomplicated and complicated babesiosis cases on both day 1 and 7. GM-CSF, IL-2 and IL-7 showed significant differences between those same groups but only on day 1. Time-course variation was significant for IL-8 and IL-10 from day 1 to day 7 both in uncomplicated and complicated cases (though with opposite trends as IL-8 increased longitudinally while IL-10 registered a very pronounced decrease). IL-8 showed a negative correlation with erythrocyte counts and hematocrit and a positive correlation with non-segmented neutrophil counts in uncomplicated cases (day 1) whereas KC-like registered as well a negative correlation with erythrocyte counts and hematocrit but in complicated cases (day 7) and a generally strong positive correlation with non-segmented neutrophil counts in all babesiosis groups.

Results observed for MCP-1 were the most significant in this study. MCP-1 together with KC-like are the only cytokines in the present study discriminating complicated from uncomplicated cases both on day 1 and 7. MCP-1 acts in the recruitment of [monocytes](#) / macrophages, [memory T cells](#), and [dendritic cells](#) to sites where either tissue injury or inflammation occurs [44]. Our results are consistent with previously reported data [45] for human sepsis in which patients show an increased level of MCP-1 with higher concentrations among non-survivors although with no statistically significant differences. Statistically significant differences

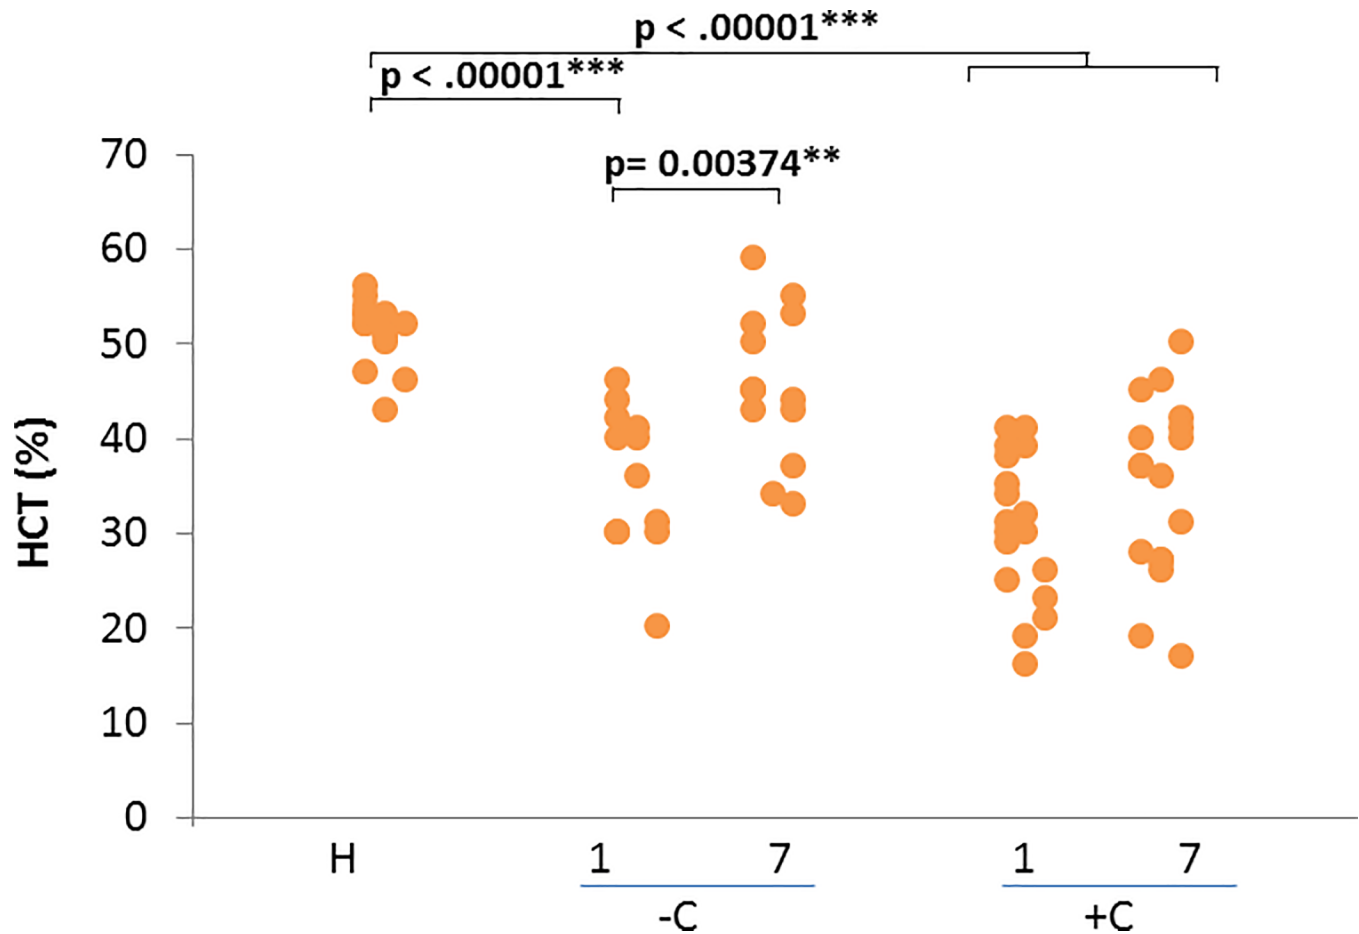

**Fig 5. Hematocrit (HCT) values and outcome.** From left to right hematocrit values for healthy dogs and values registered on day 1 and 7 of treatment for uncomplicated (-C) and complicated cases (+C). Mann-whitney test p-values are shown for comparison of different groups.

<https://doi.org/10.1371/journal.pone.0190474.g005>

in MCP-1 levels have been previously found between control dogs (118 pg/mL), survivors (431 pg/mL) and non-survivors (757 pg/mL) in the case of *B.canis*- induced babesiosis [18]. Our present data confirm that complicated cases register a higher concentration of MCP-1 than uncomplicated cases and additionally offer a comprehensive insight into the time-dependent variations of this and other cytokines.

MCP-1 has been involved in pathogenesis of several autoimmune diseases characterized by monocyte infiltrates, such as psoriasis, rheumatoid arthritis and atherosclerosis [46]. Some observations have shown that MCP-1 secretion can be induced by erythrocytic debris and coagulopathy [47] the latter being associated to mortality. Paraoxonase 1 (PON-1) has been observed to inhibit this process decreasing endothelial MCP-1 secretion [48] and previous studies have indicated a decrease in PON-1 concentration in acute babesiosis [28]. Moreover, very high plasma levels of MCP-1 and IL-6 have been often observed after incompatible transfusion-induced hemolysis, reinforcing the relationship of immune-mediated hemolysis and MCP-1. In malaria, most of the evidence supports the hypothesis that cells from the monocyte/macrophage lineage are more effective than neutrophils at phagocytosing parasitized erythrocytes [31] and this could explain the fact that MCP-1 shows much higher significance as outcome marker than IL-8 in present study.

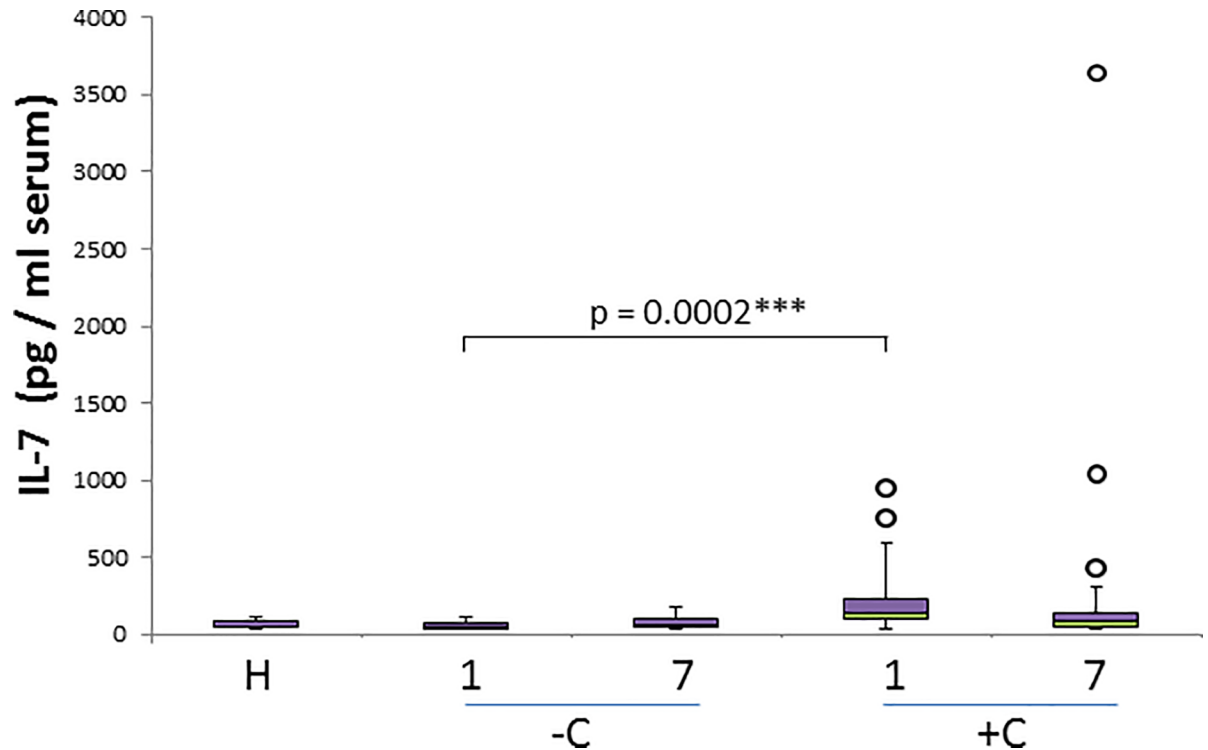

**Fig 6. IL-7 concentration in healthy and naturally infected dogs and its relation with outcome.** Box and whisker plot with outliers showing interquartile range (median bar in intersect between two colors in box) of IL-7 concentration values among different groups: healthy dogs (H), uncomplicated (-C) and complicated (+C) cases for both day 1 and day 7. Mann-whitney test p-values are shown for comparison of different groups.

<https://doi.org/10.1371/journal.pone.0190474.g006>

IL-8 or neutrophil chemotactic factor is secreted as a response of high IL-1 and TNF- $\alpha$  levels, bacterial or viral products and cellular stress [49]. It induces chemotaxis, in neutrophils and other granulocytes. Elevated IL-8 has been documented in many inflammatory conditions for both humans and animals [50, 51] as well as in severe malaria [52] and previously in *B. canis*-caused babesiosis [39]. In babesiosis caused by *B. rossi*, an exceptional decrease in IL-8 was previously reported [53] probably related to the higher virulence of *B. rossi*, pointing out the possibility that a weaker pro-inflammatory response in acute-phase can lead to a worse outcome. Our data show a clear longitudinal increase of IL-8 levels in contrast with data for *B. rossi*-caused canine babesiosis [53].

Recent studies found that both IL-8 and MCP-1 levels increase in leptospirosis, another protozoan disease [54]. In turn, IL-10 increased in only 38% of patients at the very early part of diseases, and after 2 weeks it decreased at the level of healthy group. In recent studies about malaria, levels of pro-inflammatory biomarkers, like IL-8, were higher in cerebral malaria (CM) than in non-cerebral malaria patients. In contrast, the concentrations of anti-inflammatory cytokines, like IL-10, were comparable or lower in CM patients [55]. We observed a similar pattern: higher MCP-1 levels in complicated cases and increasing levels of IL-8 in the period studied (day 1 to 7), in remarkable contrast with the decrease observed in *B. rossi*-induced babesiosis, and a similar or slightly lower IL-10 concentration associated to complications.

Recent research conducted on cell cultures has proven that the enhanced production of CXC chemokines (IL-8 is an example) can trigger oxidative stress [56] which, besides secondary IMHA, has been considered the main cause of erythrocyte destruction in canine babesiosis

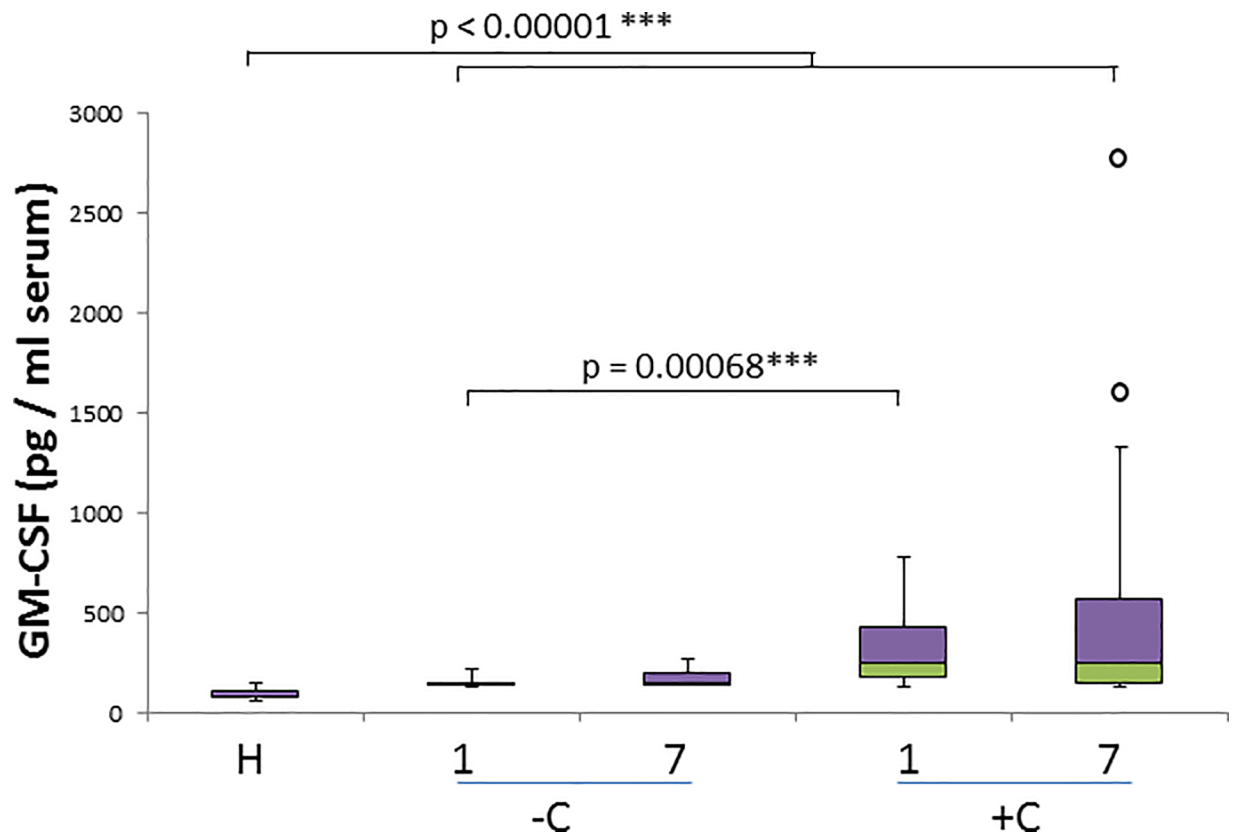

**Fig 7. GM-CSF concentration in healthy and naturally infected dogs and its relation with outcome.** Box and whisker plot with outliers showing interquartile range (median bar in intersect between two colors in box) of GM-CSF concentration values among different groups: healthy dogs (H), uncomplicated (-C) and complicated (+C) cases for both day 1 and day 7. Mann-whitney test p-values are shown for comparison of different groups.

<https://doi.org/10.1371/journal.pone.0190474.g007>

[27]. In our data, the negative correlations observed between IL-8 and hematocrit suggests that the sustained increase in IL-8 concentration occurs in parallel to hemolysis. Moreover, in a recent study erythrocyte structure was found to be notably affected by IL-8 with morphological changes resembling those typically observed in eryptosis (programmed red cell death) [57] most probably after interaction with duffy antigen chemokine receptor (DARC) on erythrocyte surface [58]. Additionally, the present data show that IL-8 levels strongly correlate with KC-Like levels among uncomplicated cases in measurements performed on the day 1, as well as in the same group on day 7. Similar results were obtained in a study on canine experimental LPS-induced endotoxemia [59]. Previous studies have shown that the concentration of IL-8 and KC-like are important factors in the pathogenesis of canine babesiosis [39]. A balance between these two cytokines might be important to avoid the occurrence of complications [11]. In relation with other hematologic parameters, we found a strong positive correlation between IL-8 as well as KC-like with non-segmented or immature neutrophils. Shorter life expectancy was recently found in patients with systemic inflammation who showed highest counts of immature neutrophils [60]. The strongest correlation between non-segmented neutrophils and KC-like was registered in complicated cases on day 1, confirming the role of KC-like in neutrophil proliferation. KC-like has been recently reported as a possible biomarker for diagnosing sepsis and uterine bacterial infection in dogs [61]. We found increased levels of KC-like in all diseased groups compared with healthy dogs and most importantly, it discriminates uncomplicated and complicated cases both on day 1 and 7.

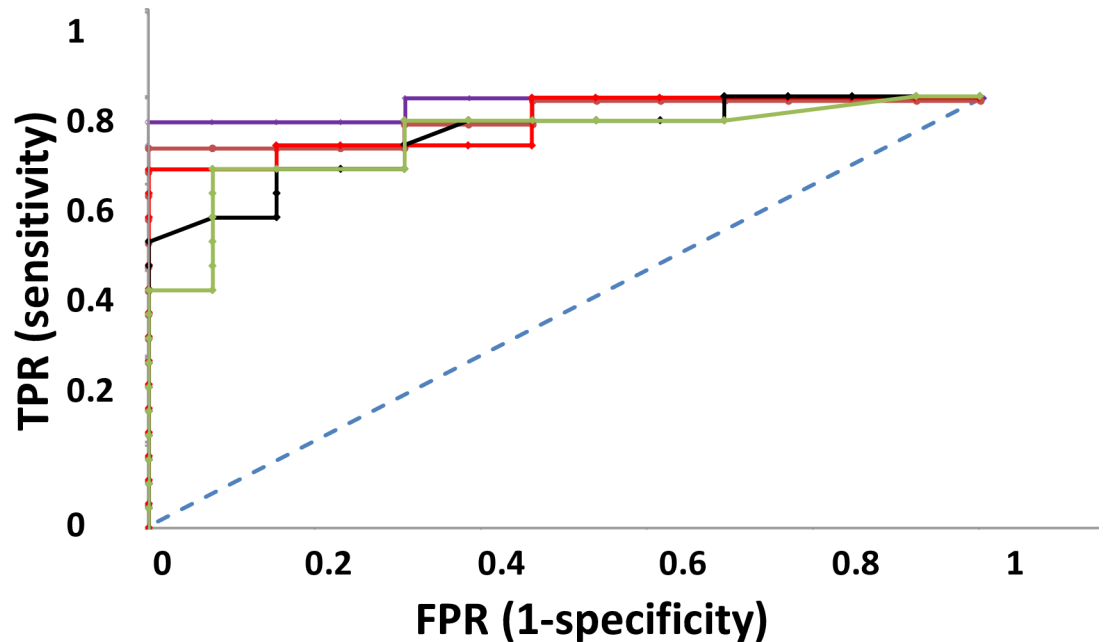

**Fig 8. Receiver operating characteristic (ROC) curve as a tool for prognosis of complications in *B. canis*-caused babesiosis and cut-off values.** ROC plot showing curves corresponding to individual cytokine values and linear combinations of different cytokine clusters for uncomplicated vs. complicated cases. MCP-1 (black), IL-7 (green), LC1 = KC-Like+IL-7+2MCP-1 (red), LC2 = KC-Like+2IL-7+2MCP-1 (orange), LC3 = GM-CSF+KC-Like+2IL-7+2MCP-1 (violet).

<https://doi.org/10.1371/journal.pone.0190474.g008>

IL-10 displays the most significant variation among all the molecules monitored in this analysis when comparing healthy and diseased groups on day 1 of treatment, in agreement with previous data for *B. rossi* [53] in which no significant difference in IL-10 was found in non-survivors with respect to survivors. Similarly, we observed no significant differences related to the occurrence of complications but we found a very significant longitudinal drop of IL-10 levels on day 7. IL-10 is an anti-inflammatory cytokine. During infection, IL-10 inhibits Th1 cells, NK cells and macrophages. Given that these cells are required for pathogen clearance, high levels of IL-10 can indirectly contribute to tissue damage. High levels of IL-10 have been detected in mice serum after infection with *B. microti* [62]. In that study the frequency of IL-10-producing regulatory B cells (Bregs) and CD4<sup>+</sup> T cells increased during the course of *B. microti* infection. Transfer of IL-10-producing B cells induced by *B. microti* infection led to

**Table 4. Cut-off values (with corresponding True Positive Rate, TPR or sensitivity and False Positive Rate, FPR or 1-specificity) and AUC for cytokines and hematologic parameters.** All values correspond to day 1 except HCT. Curve Sensitivity and specificity are indicated for each cut-off value. AUC: Area Under the Curve, SE: Standard Error.

|           | Cut-off value (pg/ml serum) | Sensitivity (%) | Specificity (%) | AUC   | SE   |
|-----------|-----------------------------|-----------------|-----------------|-------|------|
| MCP-1     | 360                         | 83.3            | 84.6            | 0.906 | 0.02 |
| IL-7      | 85                          | 83.3            | 92.3            | 0.896 | 0.07 |
| KC-LIKE   | 360                         | 83.3            | 69.2            | 0.729 | 0.11 |
| GM-CSF    | 225                         | 66.7            | 100             | 0.867 | 0.05 |
| HCT day 7 | 42                          | 82.3            | 69.2            | 0.757 | 0.14 |
| LC1       | 1445                        | 83.3            | 100             | 0.94  | 0.07 |
| LC2       | 1520                        | 88.9            | 100             | 0.957 | 0.06 |
| LC3       | 1650                        | 94.4            | 100             | 0.983 | 0.04 |

<https://doi.org/10.1371/journal.pone.0190474.t004>

increased susceptibility of recipient mice to infection with *B. microti*. In humans with sepsis and early-stage systemic inflammatory response, high levels of IL-10 and IL-10/ TNF- $\alpha$  ratio respectively are linked with poor outcome [63]. IL-10 was observed to be increased in *Plasmodium falciparum*-infected patients in agreement with our study [64] although we observed that IL-10 values reverted to values seen in healthy dogs within 6 days post-diagnosis both in uncomplicated and complicated cases indicating that babesiosis could disrupt the IL-10-producing regulatory B cell mechanisms and the fate of the disease would in part be determined by the initial levels of inflammatory cytokines rather than by the sustained inhibition of the immune response.

Our data show a very significant increase in GM-CSF in all diseased groups and higher levels in complicated versus uncomplicated groups on day 1. GM-CSF-deficient mice have been reported to display impaired resistance to blood-stage malaria reflecting the importance of hematopoietic cytokines to fight sepsis-inducing parasites [65]. GM-CSF stimulates stem cells to produce granulocytes (neutrophils, eosinophils, and basophils) and monocytes. Increase in GM-CSF has been reported in *B. rossi* infection [53] related to more severe cases.

We observed significant differences between complicated and uncomplicated cases in both IL-2 and IL-7 only on day 1. In the case of *B. rossi*-caused babesiosis a similar trend was observed, as well as in human babesiosis caused by *B. microti* [66].

Our study shows in summary a general trend in the establishment of a prevalent cytokine cluster led by MCP-1 and KC-Like as well as IL-2, IL-7 and GM-CSF and a longitudinal behavior characterised by a steady increase in IL-8 levels together with a decreased concentration of the anti-inflammatory cytokine IL-10. Nevertheless, data must be read cautiously due to the low case numbers and thus the possibility of type 1 error. Another limitation is the heterogeneity in the stage of the disease at the moment of the presentation in clinics as well as the differential treatment in the presence or absence of complications (blood transfusions for hematocrit values under 20%) and the potential effect on cytokine measurements.

Despite limitations, results obtained in longitudinal study reinforce the trends observed as it confirms the evolution of the inflammatory response in two time points for both uncomplicated and complicated cases. These data suggest the possibility of using cytokine levels as predictors of the occurrence of complications in babesiosis. Individual cytokines and groups of cytokines that might represent outcome-correlated cytokine clusters are receiving much attention in clinical research [64, 67]. The linear combination of 4 cytokines of the present study was found to be the best predictor for the occurrence of complications. Cytokines involved in tissue infiltration might be of major importance when considering the progression from simple hemolysis to SIRS and MODS.

Our data suggest the use of some of the cytokines analysed as prognostic markers. ROC curves for MCP-1 and GM-CSF show a high AUC (area under the curve) for discriminating uncomplicated from complicated cases. Hematocrit values on the day 7 are an interesting parameter to determine outcome and IL-7 shows a similar discriminating power for uncomplicated and complicated cases.

Due to the significance of MCP-1 levels observed in this analysis, a therapeutic approach can be suggested that would inhibit endothelial MCP-1 secretion. Directly affecting MCP-1 expression (using inhibitors as thiazolidinedione or anti-inflammatory antibiotics like doxycycline) to inhibit monocyte chemotaxis and migration into organs might result in beneficial effects as observed in studies performed with human lung epithelial cell lines [68] and liver [69]. An easier and more specific possibility is to use antibodies to block MCP-1 activity.



## Conclusion

Complications derived from babesiosis as SIRS and MODS are product of a complex balance of inflammatory and anti-inflammatory signals with an outcome often dependent on genetics, immune status, type of pathogen etc. Thus, clinical practice would greatly benefit from the discovery of tools to predict the onset of complications and therapeutic targets to limit the effects of excessive inflammatory response

Our data show that the hallmark of canine babesiosis caused by *Babesia canis* is a systemic inflammatory response which shares some features with hemolytic disorders and sepsis, thus, both clinical presentation and outcome of disease depend on the balance between pro- and anti-inflammatory response (cytokines). MCP-1 and KC-like discriminate complicated and uncomplicated cases on day 1, representing an important marker for pathology and outcome. IL-8 was found to show a different secretion pattern when compared to published data for babesiosis caused by *B. rossi*. This remarkable difference suggests a specific response for less virulent *B. canis*, characterised by a clearly increased level of IL-8, this cytokine was found to decrease its levels in *B. rossi*-infection, and MCP-1 together with a pronounced longitudinal drop in the level of regulatory IL-10. Consequently, our data suggest a sustained inflammatory response associated to hemolysis that might help in understanding the occurrence of complications and final death of dogs with babesiosis. Present data, as observed in ROC curves, for individual cytokine levels and even clearer for linear combinations of these values, can be useful as a foundation to develop a prognostic tool and explore its performance against a high number of individual samples. Finally, our data suggest as well the possibility of inhibiting the expression and/or secretion of MCP-1 as a way to keep the balance of pro- and anti-inflammatory responses to improve the outcome of canine babesiosis. An easier and more specific possibility is to use antibodies to block MCP-1 activity.

## Supporting information

**S1 Table. Cytokine levels, hematologic data for all samples and reference ranges used in this study.**

(XLSX)

## Acknowledgments

Cytokine level determination was performed at Fideltia biotech company's facilities in Zagreb, a company belonging to Galapagos international group. We would like to thank Kristijan Grdan for his assistance during data collection.

## Author Contributions

**Conceptualization:** Asier Galán, Vladimir Mrljak.

**Data curation:** Asier Galán, Krešo Bendelja, Vladimir Mrljak.

**Formal analysis:** Iva Mayer.

**Funding acquisition:** Renata Barić Rafaj, Vladimir Mrljak.

**Investigation:** Asier Galán, Iva Mayer, Krešo Bendelja, Velimir Sušić.

**Methodology:** Iva Mayer, Velimir Sušić, José Joaquín Cerón.

**Project administration:** Renata Barić Rafaj.

**Supervision:** Asier Galán.

**Validation:** Velimir Sušić, Vladimir Mrljak.

**Writing – original draft:** Asier Galán, Iva Mayer, Renata Barić Rafaj, Krešo Bendelja, José Joaquín Cerón, Vladimir Mrljak.

**Writing – review & editing:** Asier Galán, Vladimir Mrljak.

## References

1. Brown WC, Norimine J, Knowles DP, Goff WL. Immune control of *Babesia bovis* infection. *Veterinary Parasitology*. 2006; 138(1–2):75–87. <https://doi.org/10.1016/j.vetpar.2006.01.041> PMID: 16510249
2. Schoeman JP. Canine babesiosis. *Onderstepoort Journal of Veterinary Research*. 2009; 76(1):59–66. PMID: 19967929
3. Uilenberg G. *Babesia*—A historical overview. *Veterinary Parasitology*. 2006; 138(1–2):3–10. <https://doi.org/10.1016/j.vetpar.2006.01.035> PMID: 16513280
4. Cardoso L, Yisaschar-Mekuzas Y, Rodrigues FT, Costa A, Machado J, Diz-Lopes D, et al. Canine babesiosis in northern Portugal and molecular characterization of vector-borne co-infections. *Parasites & Vectors*. 2010;3–10
5. Barić Rafaj R, Kuleš J, Selanec J, Vrkić N, Zovko V, Zupančič M, et al. Markers of coagulation activation, endothelial stimulation, and inflammation in dogs with babesiosis. *J Vet Intern Med*. 2013; 27(5):1172–8. <https://doi.org/10.1111/jvim.12146> PMID: 23875771
6. Beck R VL, Mrljak V, Marinculić A, Beck A, Zivicnjak T, Cacciò SM. Diversity of *Babesia* and *Theileria* species in symptomatic and asymptomatic dogs in Croatia. *Int J Parasitol*. 2009; 39(7):843–8. PMID: 19367832
7. Bohm M, Leisewitz AL, Thompson PN, Schoeman JP. Capillary and venous *Babesia canis rossi* parasitaemias and their association with outcome of infection and circulatory compromise. *Veterinary Parasitology*. 2006; 141(1–2):18–29. <https://doi.org/10.1016/j.vetpar.2006.05.002> PMID: 16806713
8. Keller N, Jacobson LS, Nel M, de Clerq M, Thompson PN, Schoeman JP. Prevalence and risk factors of hypoglycemia in virulent canine babesiosis. *Journal of Veterinary Internal Medicine*. 2004; 18(3):265–70. PMID: 15188810
9. Welzl C, Leisewitz AL, Jacobson LS, Vaughan-Scott T, Myburgh E. Systemic inflammatory response syndrome and multiple-organ damage/dysfunction in complicated canine babesiosis. *Journal of the South African Veterinary Association-Tydskrif Van Die Suid-Afrikaanse Veterinere Vereniging*. 2001; 72(3):158–62.
10. Matjila PT, Carcy B, Leisewitz AL, Schetters T, Jongejan F, Gorenflot A, et al. Preliminary Evaluation of the BrEMA1 Gene as a Tool for Associating *Babesia rossi* Genotypes and Clinical Manifestation of Canine Babesiosis. *Journal of Clinical Microbiology*. 2009; 47(11):3586–92. <https://doi.org/10.1128/JCM.01110-08> PMID: 19741079
11. Solano-Gallego L, Baneth G. Babesiosis in dogs and cats—Expanding parasitological and clinical spectra. *Veterinary Parasitology*. 2011; 181(1):48–60. <https://doi.org/10.1016/j.vetpar.2011.04.023> PMID: 21571435
12. Carli E, Tasca S, Trotta M, Furlanello T, Caldin M, Solano-Gallego L. Detection of erythrocyte binding IgM and IgG by flow cytometry in sick dogs with *Babesia canis canis* or *Babesia canis vogeli* infection. *Veterinary Parasitology*. 2009; 162(1–2):51–7. <https://doi.org/10.1016/j.vetpar.2009.02.002> PMID: 19269745
13. Solano-Gallego L, Trotta M, Carli E, Carcy B, Caldin M, Furlanello T. *Babesia canis canis* and *Babesia canis vogeli* clinicopathological findings and DNA detection by means of PCR-RFLP in blood from Italian dogs suspected of tick-borne disease. *Veterinary Parasitology*. 2008; 157(3–4):211–21. <https://doi.org/10.1016/j.vetpar.2008.07.024> PMID: 18789581
14. Birkenheuer AJ, Levy MG, Breitschwerdt EB. Efficacy of combined atovaquone and azithromycin for therapy of chronic *Babesia gibsoni* (Asian genotype) infections in dogs. *Journal of Veterinary Internal Medicine*. 2004; 18(4):494–8. PMID: 15320586
15. Birkenheuer AJ, Correa MT, Levy MG, Breitschwerdt EB. Geographic distribution of babesiosis among dogs in the United States and association with dog bites: 150 cases (2000–2003). *Javma—Journal of the American Veterinary Medical Association*. 2005; 227(6):942–7.
16. Kjemtrup AM, Wainwright K, Miller M, Penzhorn BL, Carreno RA. *Babesia conradae*, sp Nov., a small canine *Babesia* identified in California. *Veterinary Parasitology*. 2006; 138(1–2):103–11. <https://doi.org/10.1016/j.vetpar.2006.01.044> PMID: 16524663

17. Camacho AT, Guitian EJ, Pallas E, Gestal JJ, Olmeda AS, Goethert HK, et al. Azotemia and mortality among *Babesia microti*-like infected dogs. *Journal of Veterinary Internal Medicine*. 2004; 18(2):141–6. PMID: [15058762](#)
18. Matijatko V, Mrljak V, Kis I, Kucer N, Forseck J, Zivicnjak T, et al. Evidence of an acute phase response in dogs naturally infected with *Babesia canis*. *Veterinary Parasitology*. 2007; 144(3–4):242–50. <https://doi.org/10.1016/j.vetpar.2006.10.004> PMID: [17116368](#)
19. Boozer AL, Macintire DK. Canine babesiosis. *Veterinary Clinics of North America-Small Animal Practice*. 2003; 33(4):885–904.
20. Brown AL, Shiel RE, Irwin PJ. Clinical, haematological, cytokine and acute phase protein changes during experimental *Babesia gibsoni* infection of beagle puppies. *Experimental Parasitology*. 2015; 157:185–96. <https://doi.org/10.1016/j.exppara.2015.08.002> PMID: [26297954](#)
21. Morais Fernandes AA, de Moura Carvalho LJ, Zanini GM, Revoredo da Silva Ventura AM, Souza JM, Cotias PM, et al. Similar cytokine responses and degrees of anemia in patients with *Plasmodium falciparum* and *Plasmodium vivax* infections in the Brazilian Amazon region. *Clinical and Vaccine Immunology*. 2008; 15(4):650–8. <https://doi.org/10.1128/CDLI.00475-07> PMID: [18256207](#)
22. Loisa P, Rinne T, Laine S, Hurme M, Kaukinen S. Anti-inflammatory cytokine response and the development of multiple organ failure in severe sepsis. *Acta Anaesthesiologica Scandinavica*. 2003; 47(3):319–25. PMID: [12648199](#)
23. Uhle F, Chousterman BG, Grutzmann R, Brenner T, Weber GF. Pathogenic, immunologic, and clinical aspects of sepsis—update 2016. *Expert Review of Anti-Infective Therapy*. 2016; 14(10):917–27. <https://doi.org/10.1080/14787210.2016.1224971> PMID: [27530423](#)
24. Ayoob AL, Hackner SG, Prittie J. Clinical management of canine babesiosis. *Journal of Veterinary Emergency and Critical Care*. 2010; 20(1):77–89. <https://doi.org/10.1111/j.1476-4431.2009.00489.x> PMID: [20230437](#)
25. Clark IA, Budd AC, Alleva LM, Cowden WB. Human malarial disease: a consequence of inflammatory cytokine release. *Malaria Journal*. 2006; 5:85 <https://doi.org/10.1186/1475-2875-5-85> PMID: [17029647](#)
26. Leisewitz AL JL, de Morais HS, Reyers F. The mixed acid-base disturbances of severe canine babesiosis. *J Vet Intern Med*. 2001; 15(5):445–52. PMID: [11596731](#)
27. Crnogaj M, Petlevski R, Mrljak V, Kis I, Torti M, Kucer N, et al. Malondialdehyde levels in serum of dogs infected with *Babesia canis*. *Veterinarni Medicina*. 2010; 55(4):163–71.
28. Rossi G, Kules J, Rafaj RB, Mrljak V, Lauzi S, Giordano A, et al. Relationship between paraoxonase 1 activity and high density lipoprotein concentration during naturally occurring babesiosis in dogs. *Research in Veterinary Science*. 2014; 97(2):318–24. <https://doi.org/10.1016/j.rvsc.2014.07.010> PMID: [25104322](#)
29. Krause PJ, Daily J, Telford SR, Vannier E, Lantos P, Spielman A. Shared features in the pathobiology of babesiosis and malaria. *Trends in Parasitology*. 2007; 23(12):605–10. <https://doi.org/10.1016/j.pt.2007.09.005> PMID: [17988944](#)
30. Matijatko V, Kis I, Torti M, Brkljacic M, Rafaj RB, Zvorc Z, et al. Systemic inflammatory response syndrome and multiple organ dysfunction syndrome in canine babesiosis. *Veterinarski Arhiv*. 2010; 80(5):611–26.
31. Angulo I, Fresno M. Cytokines in the pathogenesis of and protection against malaria. *Clinical and Diagnostic Laboratory Immunology*. 2002; 9(6):1145–52. <https://doi.org/10.1128/CDLI.9.6.1145-1152.2002> PMID: [12414742](#)
32. Lourembam SD, Sawian CE, Baruah S. Dysregulation of cytokines expression in complicated falciparum malaria with increased TGF-beta and IFN-gamma and decreased IL-2 and IL-12. *Cytokine*. 2013; 64(2):503–8. <https://doi.org/10.1016/j.cyto.2013.08.007> PMID: [24012048](#)
33. Deroost K, Tyberghein A, Lays N, Noppen S, Schwarzer E, Vanstreels E, et al. Hemozoin Induces Lung Inflammation and Correlates with Malaria-Associated Acute Respiratory Distress Syndrome. *American Journal of Respiratory Cell and Molecular Biology*. 2013; 48(5):589–600. <https://doi.org/10.1165/rcmb.2012-0450OC> PMID: [23328641](#)
34. Noone C, Parkinson M, Dowling DJ, Aldridge A, Kirwan P, Molloy SF, et al. Plasma cytokines, chemokines and cellular immune responses in pre-school Nigerian children infected with *Plasmodium falciparum*. *Malaria Journal*. 2013; 12–20.
35. Jacobson LS, Clark IA. The pathophysiology of canine babesiosis—new approaches to an old puzzle. *Journal of the South African Veterinary Association-Tydskrif Van Die Suid-Afrikaanse Veterinere Vereniging*. 1994; 65(3):134–45.
36. Bone RC. Toward an epidemiology and natural-history of sirs (systemic inflammatory response syndrome). *Jama-Journal of the American Medical Association*. 1992; 268(24):3452–5.

37. Mrljak V, Kucer N, Kules J, Tvarijonaviciute A, Brkljacic M, Crnogaj M, et al. Serum concentrations of eicosanoids and lipids in dogs naturally infected with *Babesia canis*. *Veterinary Parasitology*. 2014; 201(1–2):24–30. <https://doi.org/10.1016/j.vetpar.2014.01.002> PMID: 24468427
38. Purvis D, Kirby R. Systemic inflammatory response syndrome—septic shock. *Veterinary Clinics of North America-Small Animal Practice*. 1994; 24(6):1225–47.
39. Mayer I, Bendelja K, Brkljacic M, Crnogaj M, Smit I, Torti M, et al. Serum levels of the chemokines keratinocyte chemoattractant and interleukin-8 in dogs naturally infected with *Babesia canis canis*. *Veterinarski Arhiv*. 2015; 85(4):369–83.
40. Eichenberger RM, Riond B, Willi B, Hofmann-Lehmann R, Deplazes P. Prognostic Markers in Acute *Babesia canis* Infections. *Journal of Veterinary Internal Medicine*. 2016; 30(1):174–82. <https://doi.org/10.1111/jvim.13822> PMID: 26727465
41. Mosqueda J, Olvera-Ramirez A, Aguilar-Tipacamu G, Canto GJ. Current Advances in Detection and Treatment of Babesiosis. *Current Medicinal Chemistry*. 2012; 19(10):1504–18. <https://doi.org/10.2174/092986712799828355> PMID: 22360483
42. Zygner W, Gojska-Zygner O, Baska P, Dlugosz E. Increased concentration of serum TNF alpha and its correlations with arterial blood pressure and indices of renal damage in dogs infected with *Babesia canis*. *Parasitology Research*. 2014; 113(4):1499–503. <https://doi.org/10.1007/s00436-014-3792-1> PMID: 24553975
43. Schulte W, Bernhagen J, Bucala R. Cytokines in Sepsis: Potent Immunoregulators and Potential Therapeutic Targets—An Updated View. *Mediators of Inflammation*. 2013. 2013:165974 <https://doi.org/10.1155/2013/165974> PMID: 23853427
44. Deshmane SL, Kremlev S, Amini S, Sawaya BE. Monocyte Chemoattractant Protein-1 (MCP-1): An Overview. *Journal of Interferon and Cytokine Research*. 2009; 29(6):313–26. <https://doi.org/10.1089/jir.2008.0027> PMID: 19441883
45. Bossink AWJ, Paemen L, Jansen PM, Hack CE, Thijs LG, Vandamme J. Plasma levels of the chemokines monocyte chemoattractant protein-1 and protein-2 are elevated in human sepsis. *Blood*. 1995; 86(10):3841–7. PMID: 7579352
46. Ohman MK1 WA, Wickenheiser KJ, Luo W, Russo HM, Eitzman DT. Monocyte chemoattractant protein-1 deficiency protects against visceral fat-induced atherosclerosis. *Arterioscler Thromb Vasc Biol*. 2010; 30(6):1151–8. <https://doi.org/10.1161/ATVBAHA.110.205914> PMID: 20299683
47. Goddard A, Wiinberg B, Schoeman JP, Kristensen AT, Kjelgaard-Hansen M. Mortality in virulent canine babesiosis is associated with a consumptive coagulopathy. *Veterinary Journal*. 2013; 196(2):213–7.
48. Mackness B, Hine D, Liu YF, Mastorikou M, Mackness M. Paraoxonase-1 inhibits oxidised LDL-induced MCP-1 production by endothelial cells. *Biochemical and Biophysical Research Communications*. 2004; 318(3):680–3. <https://doi.org/10.1016/j.bbrc.2004.04.056> PMID: 15144891
49. Hoffmann E D-BO, Holtmann H, Kracht M. Multiple control of interleukin-8 gene expression. *J Leukoc Biol*. 2002; 72(5):847–55. PMID: 12429706
50. de Andres PJ, Illera JC, Caceres S, Diez L, Perez-Alenza MD, Pena L. Increased levels of interleukins 8 and 10 as findings of canine inflammatory mammary cancer. *Veterinary Immunology and Immunopathology*. 2013; 152(3–4):245–51. <https://doi.org/10.1016/j.vetimm.2012.12.010> PMID: 23351639
51. Kim CS, Park HS, Kawada T, Kim JH, Lim D, Hubbard NE, et al. Circulating levels of MCP-1 and IL-8 are elevated in human obese subjects and associated with obesity-related parameters. *International Journal of Obesity*. 2006; 30(9):1347–55. <https://doi.org/10.1038/sj.ijo.0803259> PMID: 16534530
52. Friedland JS, Ho M, Remick DG, Bunnag D, White NJ, Griffin GE. Interleukin-8 and *Plasmodium falciparum* malaria in Thailand. *Transactions of the Royal Society of Tropical Medicine and Hygiene*. 1993; 87(1):54–5. PMID: 8465395
53. Goddard A, Leisewitz AL, Kjelgaard-Hansen M, Kristensen AT, Schoeman JP. Excessive Pro-Inflammatory Serum Cytokine Concentrations in Virulent Canine Babesiosis. *Plos One*. 2016; 11(3): e0150113. <https://doi.org/10.1371/journal.pone.0150113> PMID: 26953797
54. Chirathaworn C, Kongpan S. Immune responses to *Leptospira* infection: roles as biomarkers for disease severity. *Brazilian Journal of Infectious Diseases*. 2014; 18(1):77–81. <https://doi.org/10.1016/j.bjid.2013.08.002> PMID: 24275371
55. Dieye Y, Mbengue B, Dagamajalu S, Fall MM, Loke MF, Nguer CM, et al. Cytokine response during non-cerebral and cerebral malaria: evidence of a failure to control inflammation as a cause of death in African adults. *PeerJ*. 2016; 4:e1965-e. <https://doi.org/10.7717/peerj.1965> PMID: 27168977
56. Faleiros RR, Leise BB, Westerman T, Yin C, Nuovo GJ, Belknap JK. In Vivo and In Vitro Evidence of the Involvement of CXCL1, a Keratinocyte-Derived Chemokine, in Equine Laminitis. *Journal of Veterinary Internal Medicine*. 2009; 23(5):1086–96. <https://doi.org/10.1111/j.1939-1676.2009.0349.x> PMID: 19572911

57. Bester J, Pretorius E. Effects of IL-1 beta, IL-6 and IL-8 on erythrocytes, platelets and clot viscoelasticity. *Scientific Reports*. 2016; 6:32188 <https://doi.org/10.1038/srep32188> PMID: 27561337
58. Nebor D, Durpes MC, Mougengel D, Mukisi-Mukaza M, Elion J, Hardy-Dessources MD, et al. Association between Duffy antigen receptor for chemokines expression and levels of inflammation markers in sickle cell anemia patients. *Clinical Immunology*. 2010; 136(1):116–22. <https://doi.org/10.1016/j.clim.2010.02.023> PMID: 20347396
59. Floras ANK, Holowaychuk MK, Bienzle D, Bersenas AME, Sharif S, Harvey T, et al. N-Terminal Pro-C-Natriuretic Peptide and Cytokine Kinetics in Dogs with Endotoxemia. *Journal of Veterinary Internal Medicine*. 2014; 28(5):1447–53. <https://doi.org/10.1111/jvim.12409> PMID: 25056958
60. Mare TA, Treacher DF, Shankar-Hari M, Beale R, Lewis SM, Chambers DJ, et al. The diagnostic and prognostic significance of monitoring blood levels of immature neutrophils in patients with systemic inflammation. *Critical care (London, England)*. 2015; 19:57.
61. Karlsson I, Hagman R, Johannisson A, Wang LY, Sodersten F, Wernersson S. Multiplex cytokine analyses in dogs with pyometra suggest involvement of KC-like chemokine in canine bacterial sepsis. *Veterinary Immunology and Immunopathology*. 2016; 170:41–6. <https://doi.org/10.1016/j.vetimm.2016.01.005> PMID: 26837616
62. Jeong Y-I, Hong S-H, Cho S-H, Lee W-J, Lee S-E. Induction of IL-10-Producing CD1d(high)CD(5+) Regulatory B Cells following *Babesia microti*-Infection. *Plos One*. 2012; 7(10): e46553. <https://doi.org/10.1371/journal.pone.0046553> PMID: 23071588
63. Gogos CA, Drosou E, Bassaris HP, Skoutelis A. Pro- versus anti-inflammatory cytokine profile in patients with severe sepsis: A marker for prognosis and future therapeutic options. *Journal of Infectious Diseases*. 2000; 181(1):176–80. <https://doi.org/10.1086/315214> PMID: 10608764
64. Prakash D, Fesel C, Jain R, Cazenave PA, Mishra GC, Pied S. Clusters of cytokines determine malaria severity in *Plasmodium falciparum*—Infected patients from endemic areas of central India. *Journal of Infectious Diseases*. 2006; 194(2):198–207. <https://doi.org/10.1086/504720> PMID: 16779726
65. Riopel J, Tam M, Mohan K, Marino MW, Stevenson MM. Granulocyte-macrophage colony-stimulating factor-deficient mice have impaired resistance to blood-stage malaria. *Infection and Immunity*. 2001; 69(1):129–36. <https://doi.org/10.1128/IAI.69.1.129-136.2001> PMID: 11119498
66. Shaio MF, Lin PR. A case study of cytokine profiles in acute human babesiosis. *American Journal of Tropical Medicine and Hygiene*. 1998; 58(3):335–7. PMID: 9546414
67. Yan XJ, Dozmorov I, Li WT, Yancopoulos S, Sison C, Centola M, et al. Identification of outcome-correlated cytokine clusters in chronic lymphocytic leukemia. *Blood*. 2011; 118(19):5201–10. <https://doi.org/10.1182/blood-2011-03-342436> PMID: 21911837
68. Momoi A, Murao K, Imachi H, Ishida T, Cao WM, Sato M, et al. Inhibition of monocyte chemoattractant protein-1 expression in cytokine-treated human lung epithelial cells by thiazolidinedione. *Chest*. 2001; 120(4):1293–300. PMID: 11591574
69. Baeck C WA, Karlmark KR, Heymann F, Vucur M, Gassler N, Huss S, et al. Pharmacological inhibition of the chemokine CCL2 (MCP-1) diminishes liver macrophage infiltration and steatohepatitis in chronic hepatic injury. *Gut*. 2012; 61(3):416–26. <https://doi.org/10.1136/gutjnl-2011-300304> PMID: 21813474
